# Supplementary material for: Tiny Ir doping of sub-one-nanometer PtMn nanowires: highly active and stable catalysts for alcohol electrooxidation
Source: Royal Society of Chemistry journal article supplement (doi:10.1039/d0nr02736g), 2020-01-01
Supplement: d0nr02736g1.pdf [file d0nr02736g1.pdf]

*Supporting Information for*

**Robust Ir Doping of Sub-one-nanometer PtMn Nanowires: Highly  
Active and Stable Catalysts for Alcohols Electrooxidation**

Fei Gao<sup>a</sup>, Yangping Zhang<sup>a</sup>, FangFang Ren<sup>\*b</sup>, Tongxin Song<sup>a</sup>, Yukou Du<sup>\*a</sup>

<sup>a</sup> College of Chemistry, Chemical Engineering and Materials Science, Soochow University,  
Industrial Park, Renai Road, Suzhou 215123, PR China

<sup>b</sup> College of Chemical and Environmental Engineering, Yancheng Teachers University, No. 2  
Hope Avenue South Road, Yancheng 224007, China

\* Corresponding author: E-mail: duyk@suda.edu.cn (Y. Du), fangfang7916@163.com (F. Ren).

**1. Supporting figures and tables**

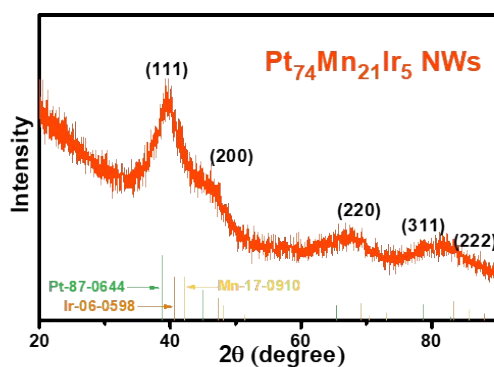

**Fig. S1** XRD pattern of Pt<sub>74</sub>Mn<sub>21</sub>Ir<sub>5</sub> NWs.

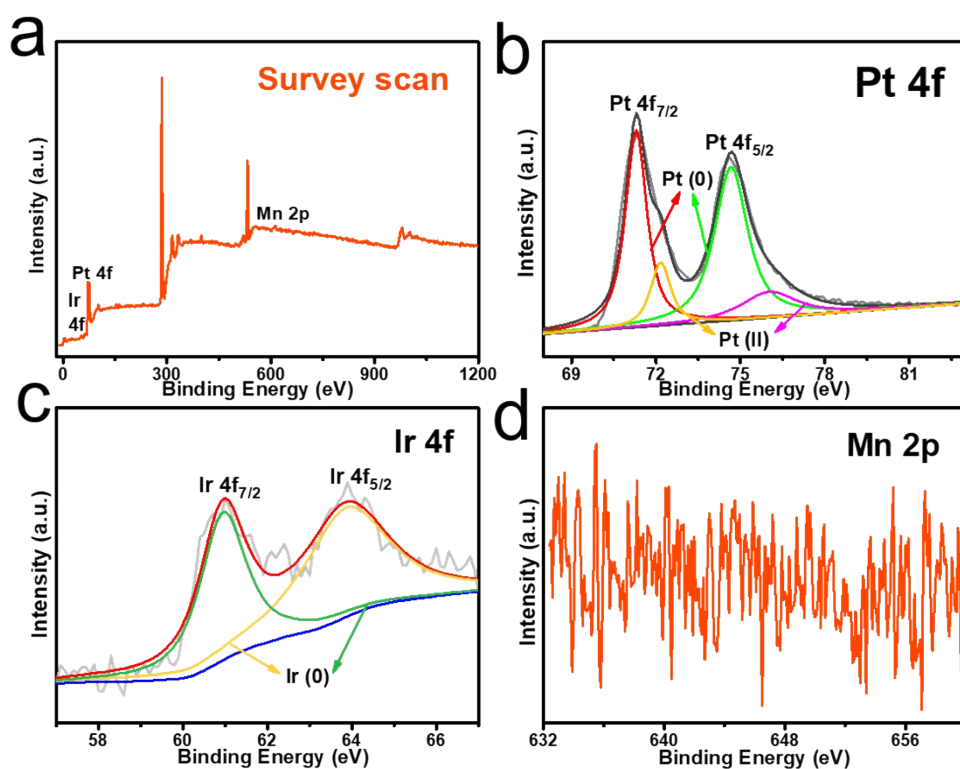

**Fig. S2** XPS spectra of (a) survey scan, (b) Pt 4f, (c) Ir 4f, (d) Mn 2p in Pt<sub>74</sub>Mn<sub>21</sub>Ir<sub>5</sub> NWs.

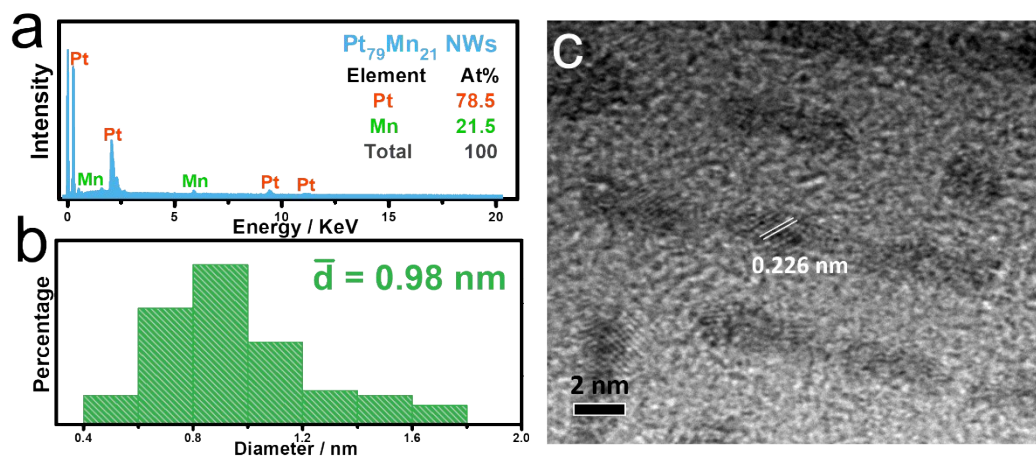

**Fig. S3** Representative (a) SEM-EDS spectrum, (b) size distribution of the diameter, (c) HRTEM image as-prepared Pt<sub>79</sub>Mn<sub>21</sub> NWs.

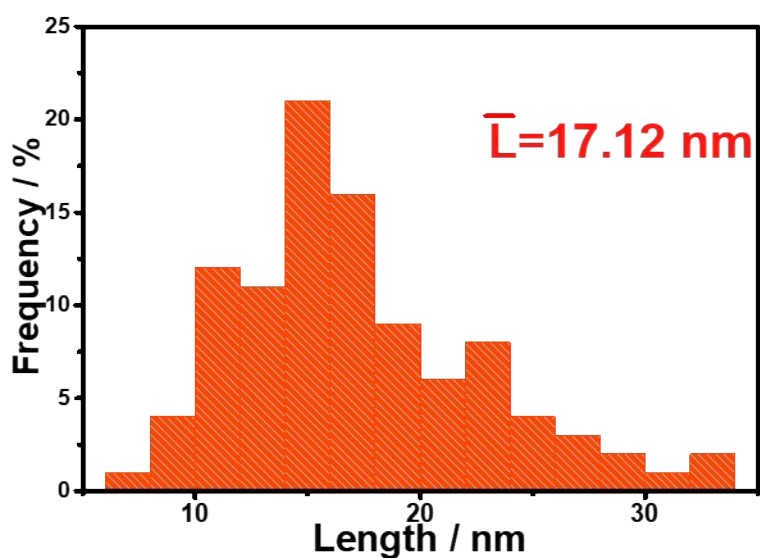

**Fig. S4** Size distribution of the length of Pt<sub>79</sub>Mn<sub>21</sub> NWs.

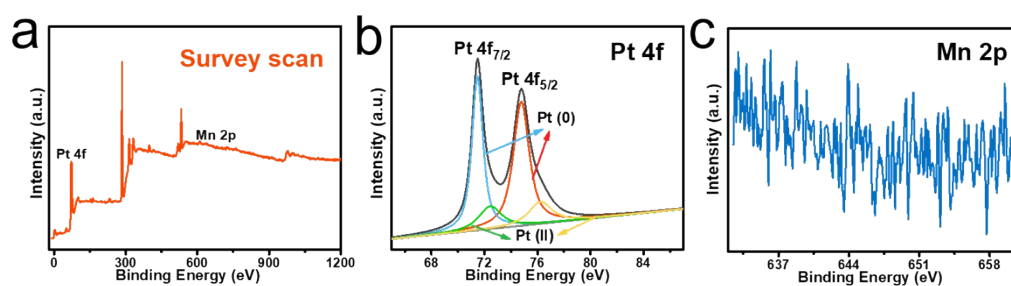

**Fig. S5** XPS spectra of (a) survey scan, (b) Pt 4f, (c) Mn 2p in Pt<sub>79</sub>Mn<sub>21</sub> NWs.

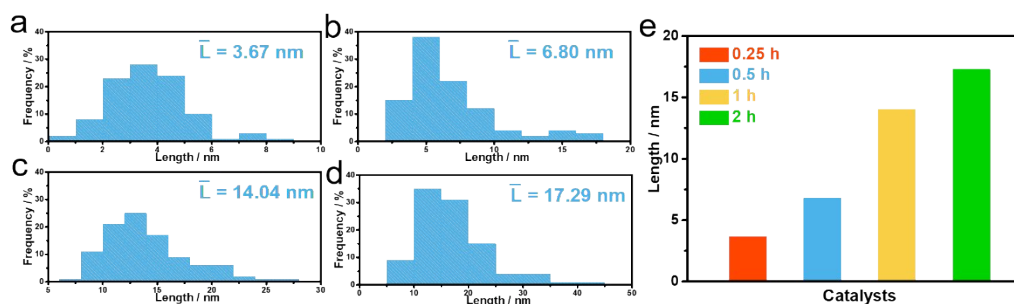

**Fig. S6** The average length of Pt<sub>74</sub>Mn<sub>21</sub>Ir<sub>5</sub> NWs intermediates collected after the reaction had prolonged for (a) 0.25, (b) 0.5, (c) 1, and (d) 2 h. (e) the average length variation of Pt<sub>74</sub>Mn<sub>21</sub>Ir<sub>5</sub> NWs intermediates.

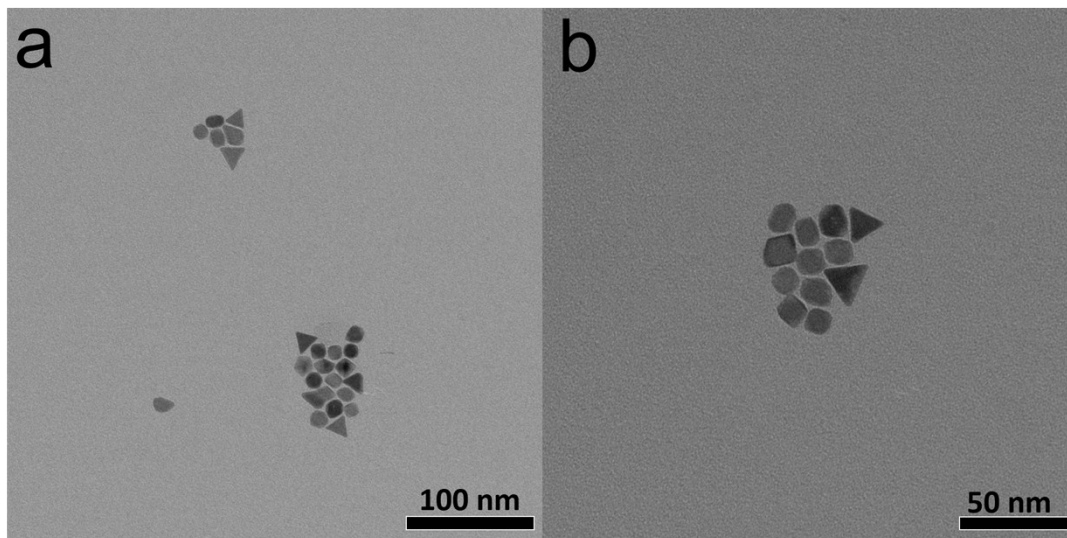

**Fig. S7** (a and b) TEM images of the products with the same reaction conditions as that of Pt<sub>74</sub>Mn<sub>21</sub>Ir<sub>5</sub> NWs without the addition of Mo(CO)<sub>6</sub>.

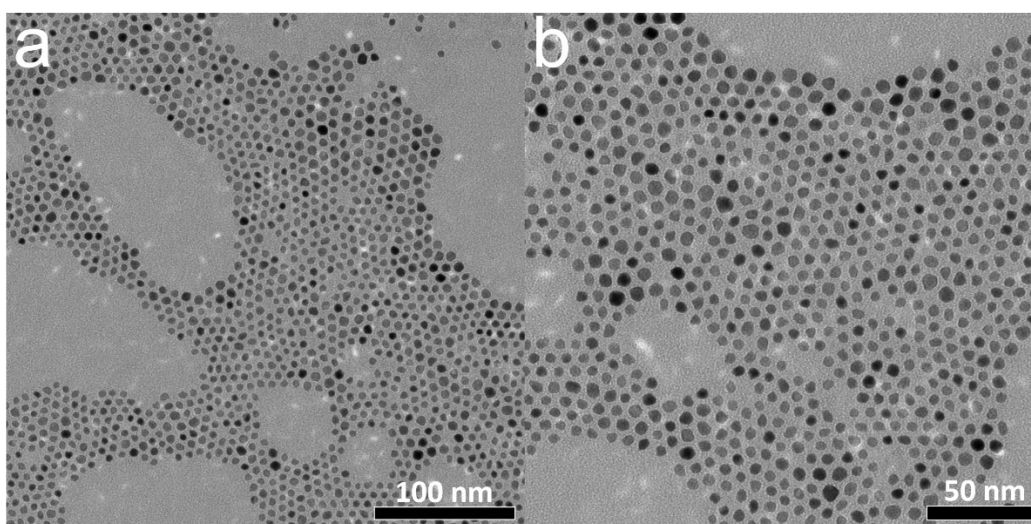

**Fig. S8** (a and b) TEM images of the products with the same reaction conditions as that of Pt<sub>74</sub>Mn<sub>21</sub>Ir<sub>5</sub> NWs without the addition of CTAC.

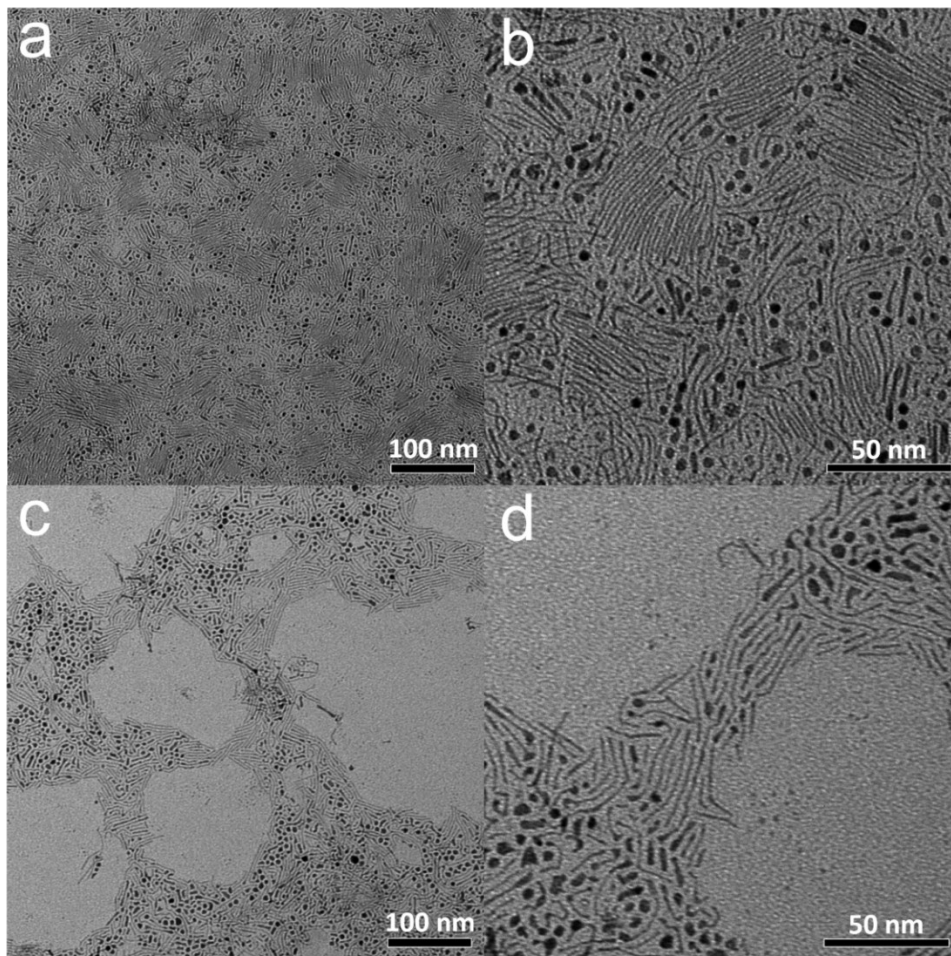

**Fig. S9** TEM images of the products with the same reaction conditions as that of (a and b) Pt<sub>74</sub>Mn<sub>21</sub>Ir<sub>5</sub> NWs and (c and d) Pt<sub>79</sub>Mn<sub>21</sub> NWs without the addition of ODE.

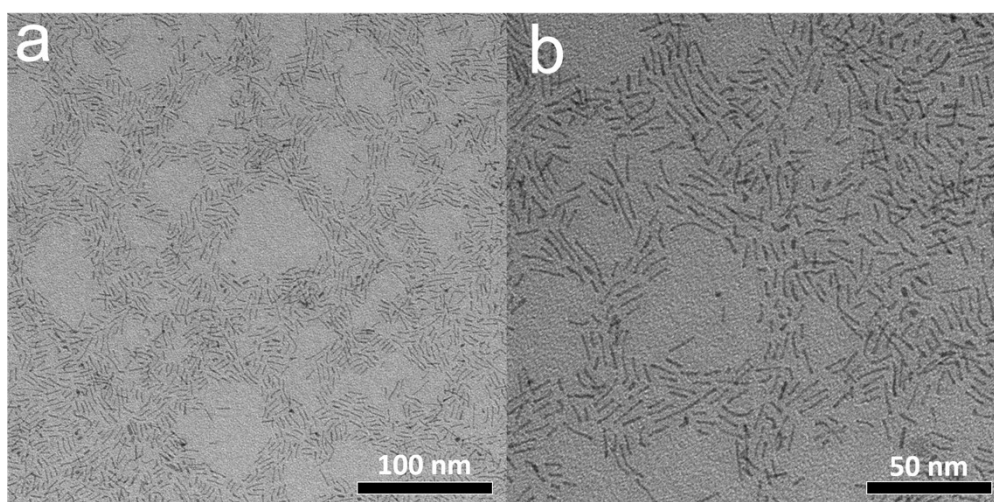

**Fig. S10** Representative TEM images of (a and b) Pt NWs.

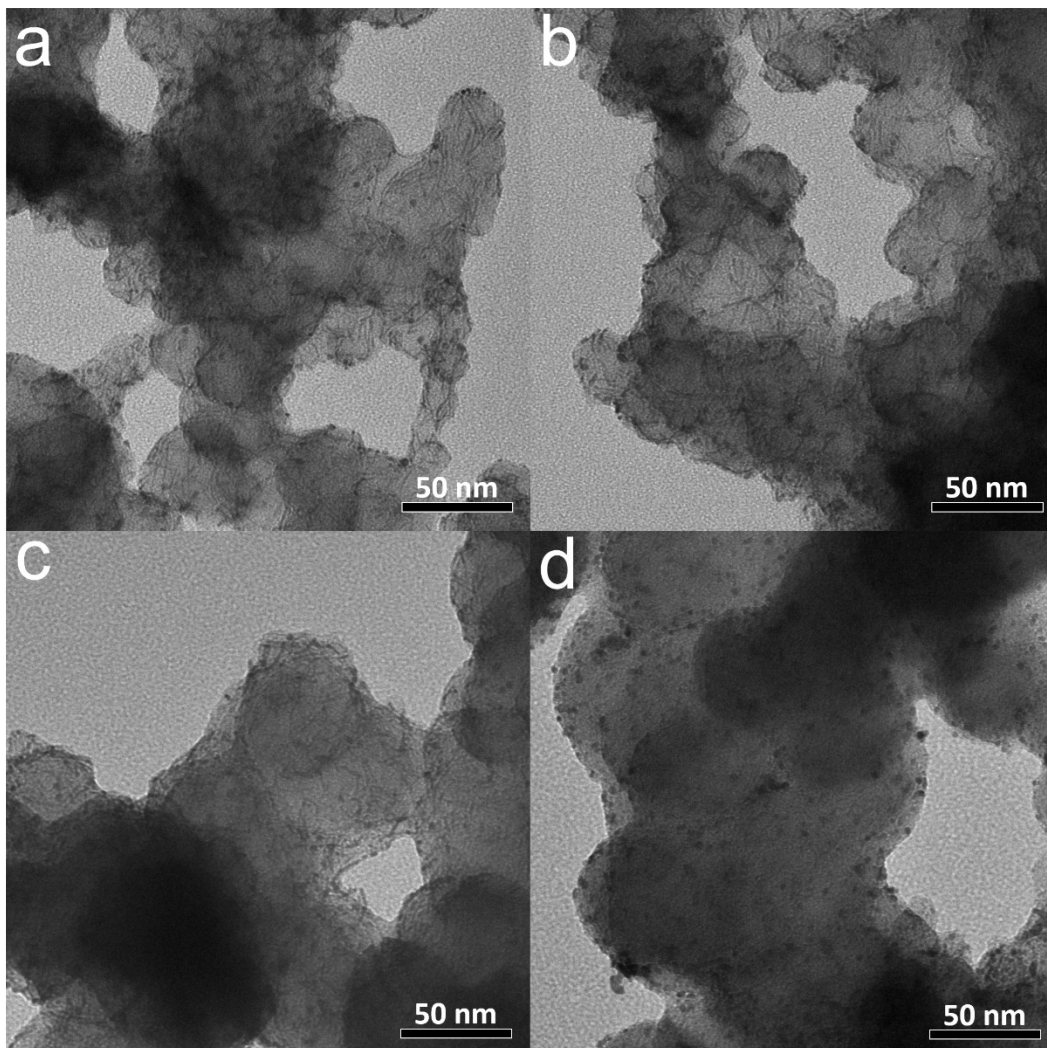

**Fig. S11** TEM images of (a) Pt<sub>74</sub>Mn<sub>21</sub>Ir<sub>5</sub> NWs, (b) Pt<sub>79</sub>Mn<sub>21</sub> NWs, (c) Pt NWs, and (d) Pt/C catalysts before electrochemical tests.

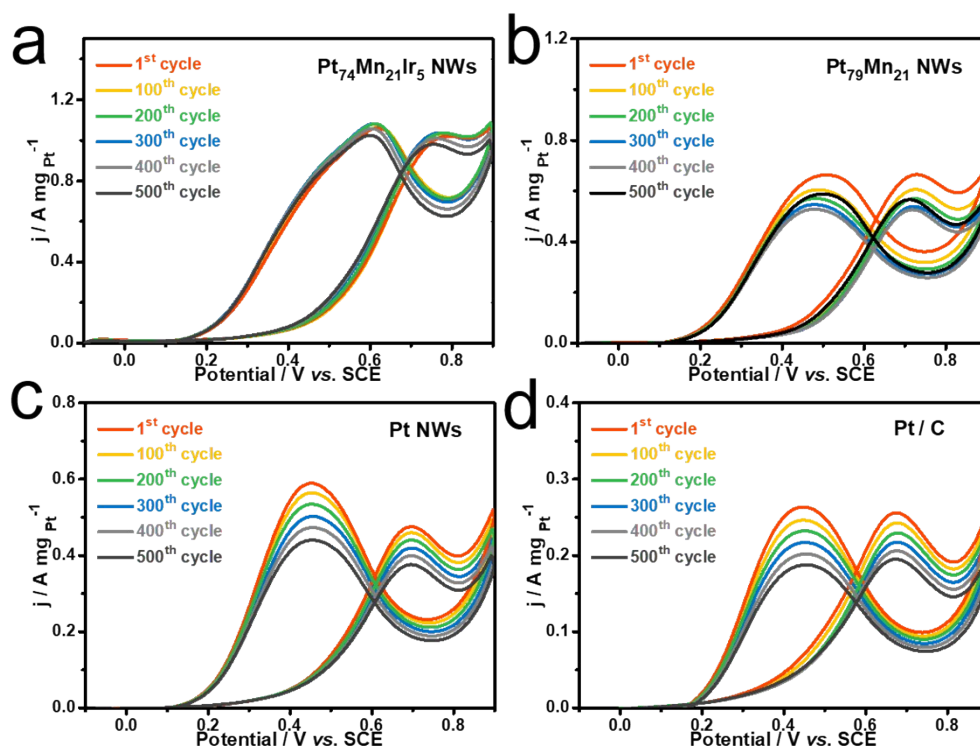

**Fig. S12** CV (1<sup>st</sup>, 100<sup>th</sup>, 200<sup>th</sup>, 300<sup>th</sup>, 400<sup>th</sup> and 500<sup>th</sup>) curves of (a) Pt<sub>74</sub>Mn<sub>21</sub>Ir<sub>5</sub> NWs, (b) Pt<sub>79</sub>Mn<sub>21</sub> NWs, (c) Pt NWs, (d) Pt/C catalysts recorded in 0.1 M HClO<sub>4</sub> + 0.5 M ethanol solution.

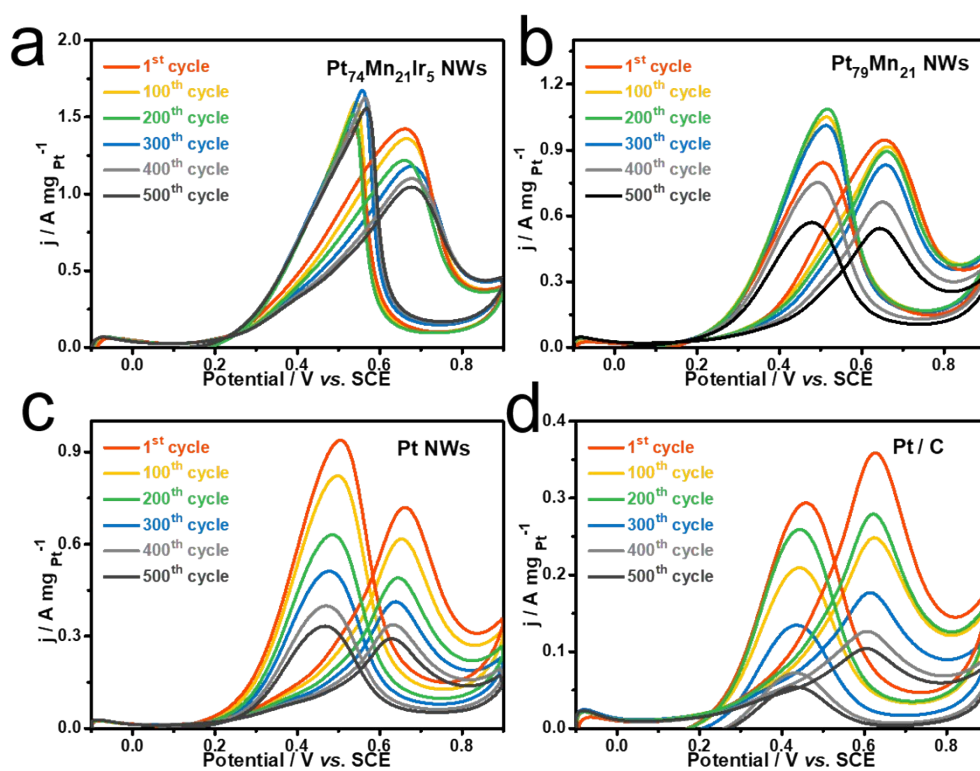

**Fig. S13** CV (1<sup>st</sup>, 100<sup>th</sup>, 200<sup>th</sup>, 300<sup>th</sup>, 400<sup>th</sup> and 500<sup>th</sup>) curves of (a) Pt<sub>74</sub>Mn<sub>21</sub>Ir<sub>5</sub> NWs, (b) Pt<sub>79</sub>Mn<sub>21</sub> NWs, (c) Pt NWs, (d) Pt/C catalysts recorded in 0.1 M HClO<sub>4</sub> + 0.5 M methanol solution.

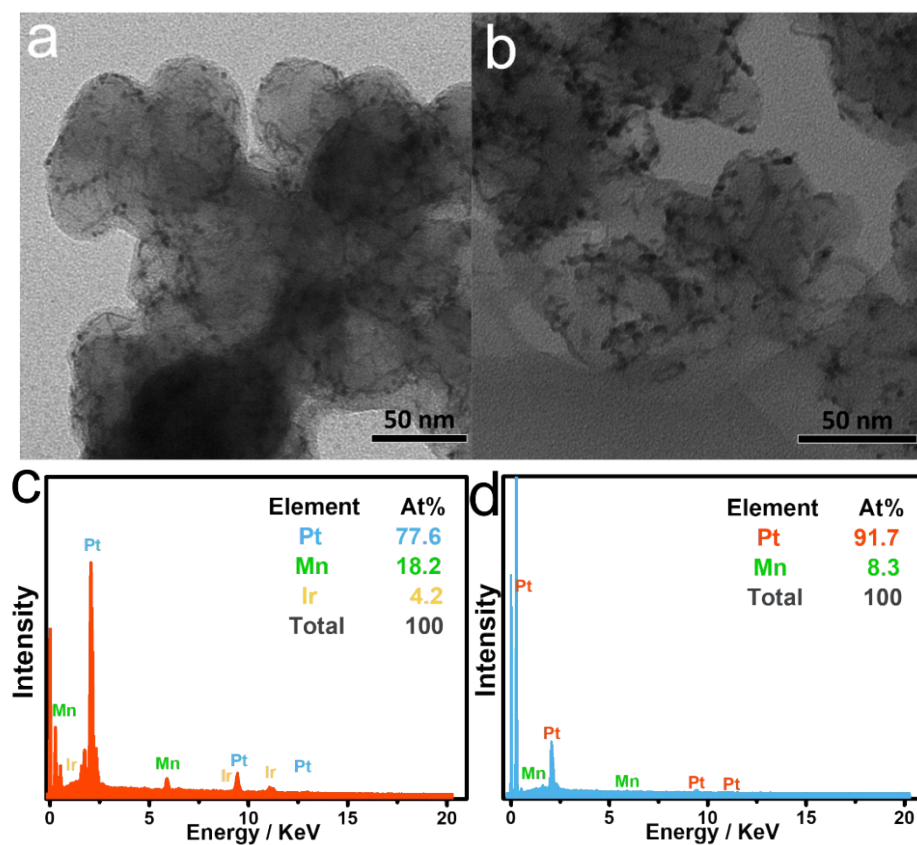

**Fig. S14** (a and c) TEM images and (b and d) EDS spectrum of Pt<sub>74</sub>Mn<sub>21</sub>Ir<sub>5</sub> NWs and Pt<sub>79</sub>Mn<sub>21</sub> NWs after stability tests.

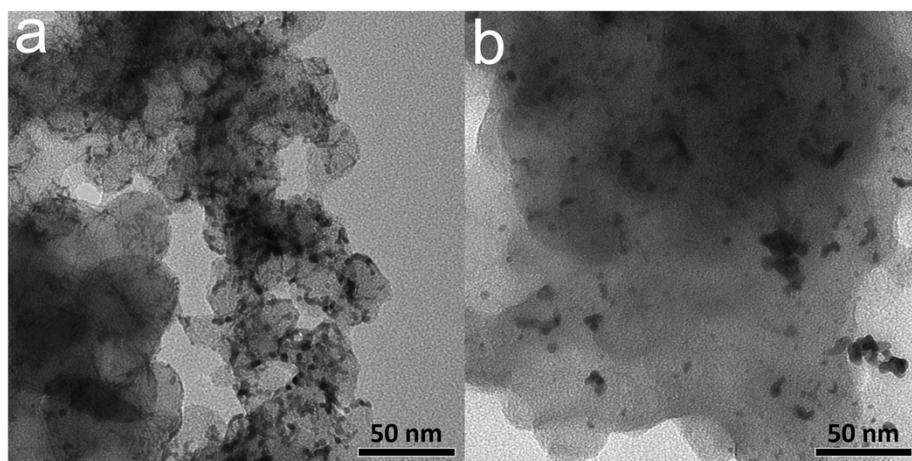

**Fig. S15** TEM images of (a) Pt NWs and (b) Pt/C catalysts after stability tests.



**Table S1.** EOR performances of Pt<sub>74</sub>Mn<sub>21</sub>Ir<sub>5</sub> NWs and various electrocatalysts from published works.

| Catalysts                                             | Peak currents from CV curves         |                                       | Electrolyte                                             | Reference                                                    |
|-------------------------------------------------------|--------------------------------------|---------------------------------------|---------------------------------------------------------|--------------------------------------------------------------|
|                                                       | J <sub>m</sub> (A mg <sup>-1</sup> ) | J <sub>s</sub> (mA cm <sup>-2</sup> ) |                                                         |                                                              |
| Pt <sub>74</sub> Mn <sub>21</sub> Ir <sub>5</sub> NWs | 1.02                                 |                                       | 0.1 M HClO <sub>4</sub> +<br>0.5 M Ethanol              | This work                                                    |
| Pt-Cu Nanocone                                        | ~ 0.4                                | 2.97                                  | 0.5 M H <sub>2</sub> SO <sub>4</sub> +<br>0.1 M Ethanol | <i>J. Am. Chem. Soc.</i> <b>2013</b> , 135, 18304-18307.     |
| THH PtNi NFs                                          | 0.77                                 | 1.99                                  | 0.5 M H <sub>2</sub> SO <sub>4</sub> +<br>0.1 M Ethanol | <i>Nano Lett.</i> <b>2016</b> , 16, 2762-2767.               |
| RDH PtNi NFs                                          | 0.98                                 | 1.79                                  |                                                         |                                                              |
| PtRhNi/C                                              | 0.378                                |                                       | 0.5 M HClO <sub>4</sub> + 1<br>M Ethanol                | <i>ChemElectroChem</i> <b>2015</b> , 2, 903-908              |
| PtPb <sub>0.27</sub> NWs                              | ~ 1.7                                | ~ 0.9                                 | 0.1 M HClO <sub>4</sub> +<br>0.15 M Ethanol             | <i>Chem. Mater.</i> <b>2016</b> , 28, 4447-4452.             |
| PtCu <sub>2.1</sub> NWs                               | 1.015                                | 2.16                                  | 0.1 M HClO <sub>4</sub> +<br>0.2 M Ethanol              | <i>Nano Lett.</i> <b>2016</b> , 16, 5037–5043                |
| RuNi@PtRu/<br>SWCNT                                   | 0.9534                               |                                       | 0.5 M H <sub>2</sub> SO <sub>4</sub> +<br>1 M Ethanol   | <i>Energy Environ. Sci.</i> <b>2011</b> , 4, 4513-4516.      |
| PtRh<br>NW/GNS                                        | 1                                    | 2.8                                   | 1 M H <sub>2</sub> SO <sub>4</sub> + 1<br>M Ethanol     | <i>ACS Appl. Mater. Interface</i> <b>2017</b> , 9, 3535-3543 |

**Table S2.** MOR performances of Pt<sub>74</sub>Mn<sub>21</sub>Ir<sub>5</sub> NWs and various electrocatalysts from published works.

| Catalysts                                              | Peak currents from CV curves         |                                       | Electrolyte                                         | Reference                                                   |
|--------------------------------------------------------|--------------------------------------|---------------------------------------|-----------------------------------------------------|-------------------------------------------------------------|
|                                                        | J <sub>m</sub> (A mg <sup>-1</sup> ) | J <sub>s</sub> (mA cm <sup>-2</sup> ) |                                                     |                                                             |
| Pt <sub>74</sub> Mn <sub>21</sub> Ir <sub>5</sub> NWs  | 1.42                                 |                                       | 1 M HClO <sub>4</sub> + 1 M methanol                | This work                                                   |
| Pt <sub>3</sub> Cu Nanoicosahedra                      | 0.736                                | 2.14                                  | 0.1 M HClO <sub>4</sub> + 0.2 M methanol            | <i>ACS Nano</i> , <b>2015</b> , 9, 7634-7640                |
| Pt <sub>3</sub> Cu Nanooctahedra                       | 0.518                                | 1.63                                  |                                                     |                                                             |
| PtFe NWs                                               |                                      | 1.20                                  | 0.5 M H <sub>2</sub> SO <sub>4</sub> + 1 M Methanol | <i>Chem. Eur. J.</i> <b>2013</b> , 19, 233-239.             |
| PtNi Concave Nanooctahedra                             | 0.44                                 | 1.55                                  | 0.1 M HClO <sub>4</sub> and 1 M Methanol            | <i>Angew. Chem. Int. Ed.</i> <b>2012</b> , 51, 12524-12528. |
| Fe <sub>28</sub> Pt <sub>38</sub> Pd <sub>34</sub> NWs | 0.4887                               |                                       | 0.1M HClO <sub>4</sub> + 0.2 M Methanol             | <i>J. Am. Chem. Soc.</i> <b>2012</b> , 51, 15354-15357.     |
| Pt <sub>7</sub> Ru <sub>2</sub> Fe NWs                 |                                      | 2.27                                  | 0.1 M HClO <sub>4</sub> + 0.5 M Methanol            | <i>Energy Environ. Sci.</i> <b>2015</b> , 8, 350-363.       |
| PtPb CNCs                                              | 0.97                                 | 2.09                                  | 0.1 M HClO <sub>4</sub> +0.5 M Methanol             | <i>Chem. Mater.</i> <b>2017</b> , 29, 4557-4562             |
